# Supplementary material for: Engineering of PMo12@NiCo-LDH compositevia in situencapsulation-reassembly strategy for highly selective photocatalytic reduction of CO2to CH4
Source: Royal Society of Chemistry journal article supplement (doi:10.1039/d2qi02325c), 2022-12-23
Supplement: d2qi02325c1.pdf [file d2qi02325c1.pdf]

## Supplementary Information for:

# Engineering of $\text{PMo}_{12}@NiCo-LDH$ composite *via in-situ* encapsulation-reassembly strategy for highly selective photocatalytic reduction of $\text{CO}_2$ to $\text{CH}_4$

Huaiying Zhang, Dongyuan Cui, Tianyang Shen, Tong He, Danzhong Sun, Sai An\*, Bo Qi, and Yu-Fei Song\*

State Key Laboratory of Chemical Resource Engineering, Beijing University of Chemical Technology, Beijing 100029 P. R. China. \*E-mail: songyf@mail.buct.edu.cn, ansai@mail.buct.edu.cn; Tel/Fax: +86 10-64431832.

### List of contents

- Figure S1.** Topology diagram of the  $\text{PMo}_{12}@ZIF-67$  precursor.
- Figure S2.** SEM images of  $\text{PMo}_{12}@ZIF-67$ ; TEM images of as-prepared  $\text{PMo}_{12}@NiCo-LDH$  and recycled  $\text{PMo}_{12}@NiCo-LDH$  after  $\text{CO}_2\text{PR}$ .
- Figure S3.** HRTEM image of  $\text{PMo}_{12}@NiCo-LDH$  with corresponding FFT diffraction pattern inside; EDS spectrum of  $\text{PMo}_{12}@NiCo-LDH$ .
- Figure S4.** XRD patterns of  $\text{PMo}_{12}@NiCo-LDH$  and  $NiCo-LDH$ .
- Figure S5.** NLDFT pore size distribution profile of  $\text{PMo}_{12}@ZIF-67$ ; BJH pore size distribution profile of  $\text{PMo}_{12}@NiCo-LDH$ .
- Figure S6.** XPS spectra of N 1s for  $\text{PMo}_{12}@ZIF-67$  and  $\text{PMo}_{12}@NiCo-LDH$ .
- Figure S7.** The figure of the experimental set up for  $\text{CO}_2\text{PR}$ .
- Figure S8.** Selectivity and production rate of  $\text{H}_2$ ,  $\text{CO}$  and  $\text{CH}_4$  in  $\text{CO}_2\text{PR}$  with various dosage of  $\text{PMo}_{12}@NiCo-LDH$ ; selectivity and production rate of  $\text{H}_2$ ,  $\text{CO}$  and  $\text{CH}_4$  for  $\text{PMo}_{12}@NiCo-LDH$  in  $\text{CO}_2\text{PR}$  with various dosage of  $\text{Ru}(\text{bpy})_3\text{Cl}_2 \cdot 6\text{H}_2\text{O}$ .
- Figure S9.** Selectivity and production rate of  $\text{H}_2$ ,  $\text{CO}$  and  $\text{CH}_4$  for  $\text{PMo}_{12}@NiCo-LDH$  in  $\text{CO}_2\text{PR}$  with various volume ratio of  $\text{CH}_3\text{CN} : \text{TEOA} : \text{H}_2\text{O}$ .
- Figure S10.** The influence of  $\text{PMo}_{12}$  loading, catalysts, reaction conditions on the production rate of  $\text{H}_2$ ,  $\text{CO}$  and  $\text{CH}_4$  in  $\text{CO}_2\text{PR}$ .
- Figure S11.** GC spectrum (connected to MS) of the reaction products for  $\text{PMo}_{12}@NiCo-LDH$  in  $\text{CO}_2\text{PR}$ .
- Figure S12.**  $^1\text{H}$  NMR spectra of  $\text{CH}_3\text{CN}$ ,  $\text{TEOA}$ ,  $\text{Ru}(\text{bpy})_3\text{Cl}_2 \cdot 6\text{H}_2\text{O}$  and the liquid mixture of reaction system before and after  $\text{CO}_2\text{PR}$ .
- Figure S13.** Production rate of  $\text{H}_2$ ,  $\text{CO}$  and  $\text{CH}_4$  in  $\text{CO}_2\text{PR}$  under irradiation of various wavelength and in various cycle numbers under  $\lambda > 500$  nm.
- Figure S14.** XRD patterns and FT-IR spectra of as-prepared  $\text{PMo}_{12}@NiCo-LDH$  and recycled  $\text{PMo}_{12}@NiCo-LDH$  after  $\text{CO}_2\text{PR}$ .

**Figure S15.** XPS spectra of Mo 3*d*, Ni 2*p* and Co 2*p* for as-prepared PMo<sub>12</sub>@NiCo-LDH and recycled PMo<sub>12</sub>@NiCo-LDH after CO<sub>2</sub>PR.

**Figure S16.** Electrochemical impedance spectra (EIS), photocurrent-time profiles, room-temperature photoluminescence (PL) spectra of NiCo-LDH and PMo<sub>12</sub>@NiCo-LDH.

**Figure S17.** UV-vis spectra and bandgaps calculated from Tauc plots of PMo<sub>12</sub>@NiCo-LDH and NiCo-LDH; Mott-Schottky plots of PMo<sub>12</sub>@NiCo-LDH and NiCo-LDH. valance band XPS spectra of PMo<sub>12</sub>@NiCo-LDH and NiCo-LDH; conduction band minimum (CBM), valence band maximum (VBM) of PMo<sub>12</sub>@NiCo-LDH and NiCo-LDH.

**Figure S18.** XPS spectra of O 1*s* for PMo<sub>12</sub>@NiCo-LDH and recycled PMo<sub>12</sub>@NiCo-LDH after the CO<sub>2</sub>PR.

**Table S1.** Porosity properties of PMo<sub>12</sub>@ZIF-67 and PMo<sub>12</sub>@NiCo-LDH.

**Table S2.** Comparison of CO<sub>2</sub>PR performance for various photocatalytic system in this work and in previous literature.

## Experimental section

**Chemicals and materials.** Phosphomolybdic acid ( $\text{PMo}_{12}$ ), methanol, ethanol, and acetonitrile were obtained from Fuchen (Tianjin) Chemical Reagent Co., Ltd. 2-methylimidazole (2-MIM), terpyridine ruthenium chloride ( $\text{Ru}(\text{bpy})_3\text{Cl}_2 \cdot 6\text{H}_2\text{O}$ , 98%), and triethanolamine (TEOA, 99%) were purchased from Energy chemical. Cobalt (II) nitrate hexahydrate ( $\text{Co}(\text{NO}_3)_2 \cdot 6\text{H}_2\text{O}$ , 99%) and nickel (II) nitrate hexahydrate ( $\text{Co}(\text{NO}_3)_2 \cdot 6\text{H}_2\text{O}$ , 99%) were purchased from Sigma-Aldrich trading Co., Ltd. High purity  $\text{CO}_2$  (99.999%) and  $^{13}\text{CO}_2$  (99%) were obtained from Linde Gas Co., Ltd. All the chemicals were used directly without any further purification.

**Synthesis of  $\text{PMo}_{12}@\text{ZIF-67}$ .** The synthesis of  $\text{PMo}_{12}@\text{ZIF-67}$  referenced to the literature with tiny modification<sup>[1]</sup>. Typically, the mixture of 2.5 mmol  $\text{Co}(\text{NO}_3)_2 \cdot 6\text{H}_2\text{O}$  in 25 mL methanol and 10 mL aqueous solution contained certain amount of Keggin-type POMs  $\text{H}_3\text{PMo}_{12}\text{O}_{40}$  ( $1.2 \times 10^{-2}$  mmol, 25 mg) was stirred continuously at room temperature for 30 min. Subsequently, 40.0 mmol 2-methylimidazole in 25 mL methanol was dropwise added, and a purple suspension was produced. After stirring for 2.5 h, the bluish violet precipitate was collected *via* centrifugation, washing with methanol for several times, and drying at 60 °C in vacuum overnight. The obtained solid was denoted as  $\text{PMo}_{12}@\text{ZIF-67}$ . For comparison, ZIF-67 was prepared by the same method except for the absence of  $\text{H}_3\text{PMo}_{12}\text{O}_{40}$ .

**Synthesis of  $\text{PMo}_{12}@\text{NiCo-LDH}$ .** Firstly,  $\text{Ni}(\text{NO}_3)_2 \cdot 6\text{H}_2\text{O}$  (0.42 mmol, 120 mg) was dissolved in 25 mL ethanol with vigorous stirring for 30 min. Subsequently, 40 mg  $\text{PMo}_{12}@\text{ZIF-67}$  was added into the above solution. After continuous stirring at room temperature for another 2 h, the precipitation was collected *via* centrifugation, washing with ethanol for several times, and drying at 60 °C in vacuum overnight. The resultant solid was denoted as  $\text{PMo}_{12}@\text{NiCo-LDH}$ .

**Synthesis of NiCo-LDH.** NiCo-LDH was prepared by the same method as  $\text{PMo}_{12}@\text{NiCo-LDH}$ , except for the replacement of  $\text{PMo}_{12}@\text{ZIF-67}$  to ZIF-67.

**Characterizations.** High-resolution transmission electron microscopy (HRTEM) images were performed on a JEOL JEM-2200FS operating at 200 kV. Elemental mapping EDS spectra were recorded using energy dispersive spectroscopy attached to

JEOL JEM-2200FS. Scanning electron microscopy (SEM) images were performed on a Zeiss Supra55. Inductively coupled plasma atomic emission spectroscopy (ICP-AES) analysis was carried out on a Shimadzu ICPS-7500 instrument. Fourier transform infrared (FT-IR) spectra were collected on a Bruker Vector 22 infrared spectrometer using the KBr pellet method at wavenumbers ranging from 4000 to 400  $\text{cm}^{-1}$ . X-ray diffraction (XRD) patterns were collected by a Rigaku XRD-6000 diffractometer equipped with a Cu  $K\alpha$  radiation ( $\lambda = 1.5405 \text{ \AA}$ ).  $\text{N}_2$  adsorption-desorption measurements were determined on a Micromeritics ASAP 2020 M surface area and porosity analyzer, with samples pre- degassing under vacuum at 100 °C for 6 h. X-ray photoelectron spectroscopy (XPS) spectra were performed on a monochromatized ALK exciting X-radiation (PHI Quantera SXM), which were calibrated against C 1s at 284.8 eV. Solid-state ultraviolet-visible (UV-vis) diffuse reflectance spectra were collected on a Beijing PGENERAL TU-1901 spectrometer, with wavelength ranging from 200 to 800 nm. *In-situ* diffuse reflectance infrared Fourier transform spectroscopy (*in-situ* DRIFT) was performed on a Bruker TENSOR II spectrometer.

***CO<sub>2</sub> photocatalytic reduction (CO<sub>2</sub>PR).*** The CO<sub>2</sub>PR was carried out in a sealed stainless reactor (40 mL) with a quartz top window for light irradiation. In a typical run, 10 mg PMo<sub>12</sub>@NiCo-LDH powder was dispersed in 10 mL solution with CH<sub>3</sub>CN : H<sub>2</sub>O : TEOA = 6 : 2 : 2 (v/v/v), following by addition of  $4.4 \times 10^{-3}$  mmol (3.3 mg) Ru(bpy)<sub>3</sub>Cl<sub>2</sub>·6H<sub>2</sub>O. The reactor was then sealed and evacuated by a vacuum pump to remove the residual air completely. High purity CO<sub>2</sub> was filled into the reactor, with the pressure of 0.18 MPa. Under the irradiation of visible light (400–800 nm) with continuous stirring for 1 h, the gaseous products were collected and analyzed qualitatively and quantitatively by Shimadzu GC-2014 gas chromatography equipped with both flame ionization detector (FID) and thermal conductivity detector (TCD). <sup>1</sup>H NMR spectra were collected on a Bruker AV400 NMR spectrometer at 400 MHz to detected the possible liquid products. The isotopic-labeled experiments were carried out with <sup>13</sup>CO<sub>2</sub> instead of high purity <sup>12</sup>CO<sub>2</sub> under the same condition. After irradiation for 1 h, the resultant products were collected and analyzed through gas chromatography-mass spectrometry (GC-MS, QP2020 equipped with Micropacked

column).

***Electrochemical measurements.*** Electrochemical measurements were all performed on a CHI760A electrochemical workstation (Shanghai Chenhua, China) in a standard three-electrode quartz cell with 0.1 M Na<sub>2</sub>SO<sub>4</sub> aqueous solution as the electrolyte. Electrochemical impedance spectroscopy (EIS) was recorded with carbon paper coated by PMo<sub>12</sub>@NiCo-LDH or NiCo-LDH as a working electrode, Pt foil as a counter electrode, and Ag/AgCl (in saturated KCl) as a reference electrode. Transient photocurrent measurements and Mott-Schottky tests were measured with indium tin oxide (ITO) coated by PMo<sub>12</sub>@NiCo-LDH or NiCo-LDH as a working electrode, Pt foil as a counter electrode, and Ag/AgCl (in saturated KCl) as a reference electrode.

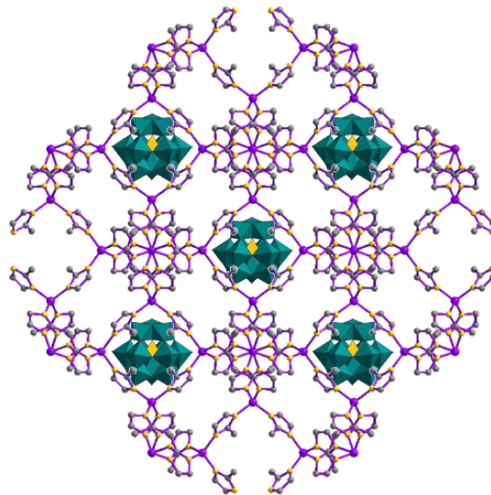

**Figure S1.** Topology diagram of the  $\text{PMo}_{12}@ZIF-67$  precursor.

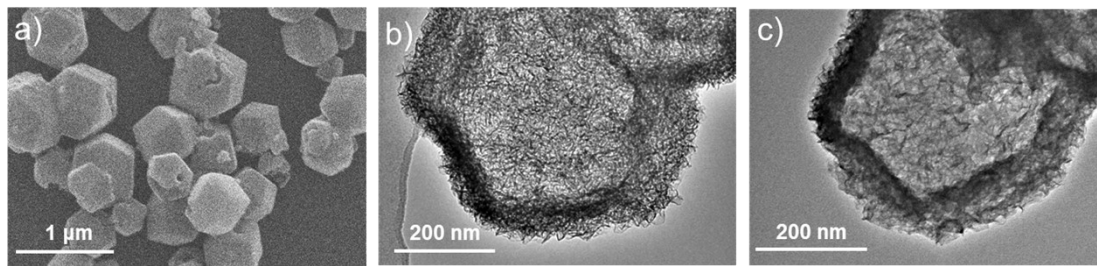

**Figure S2.** a) SEM images of  $\text{PMo}_{12}@ZIF-67$ ; TEM images of b) as-prepared  $\text{PMo}_{12}@NiCo-LDH$  and c) recycled  $\text{PMo}_{12}@NiCo-LDH$  after  $\text{CO}_2\text{PR}$ .

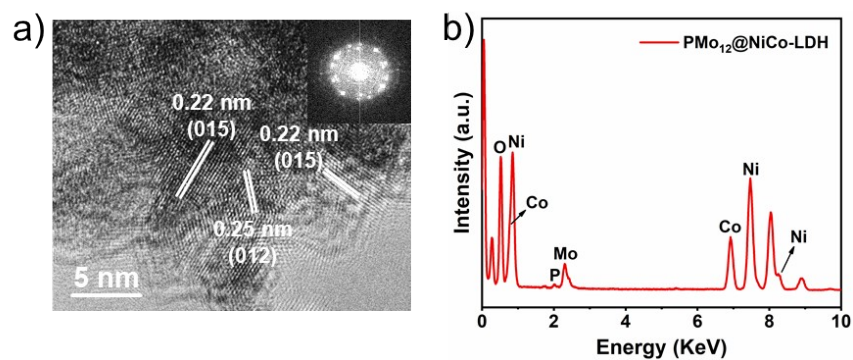

**Figure S3.** a) HRTEM image of  $\text{PMo}_{12}@NiCo-LDH$  with corresponding FFT diffraction pattern inside; b) EDS spectrum of  $\text{PMo}_{12}@NiCo-LDH$ .

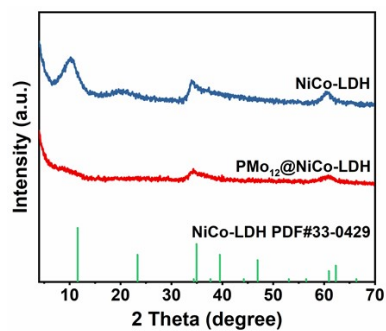

**Figure S4.** XRD patterns of  $\text{PMo}_{12}@NiCo-LDH$  and  $NiCo-LDH$ .

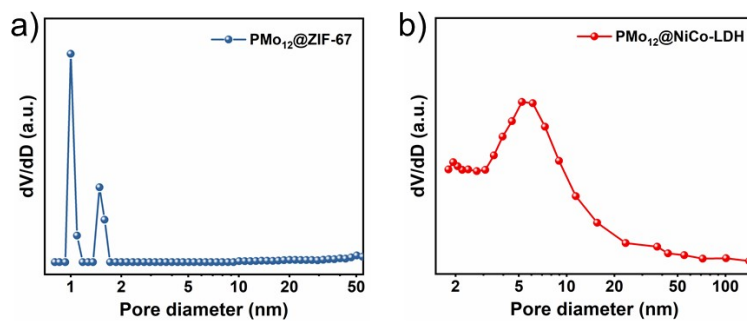

**Figure S5.** a) NLDFT pore size distribution profile of  $\text{PMo}_{12}@ZIF-67$ ; b) BJH pore size distribution profile of  $\text{PMo}_{12}@NiCo-LDH$ .

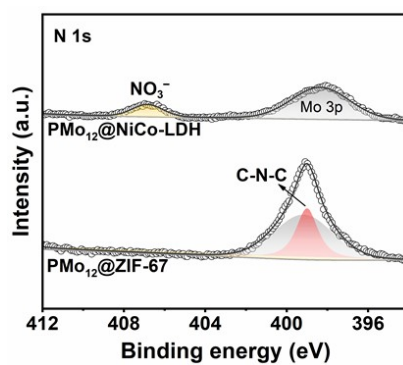

**Figure S6.** XPS spectra of  $N\ 1s$  for  $\text{PMo}_{12}@ZIF-67$  and  $\text{PMo}_{12}@NiCo-LDH$ .

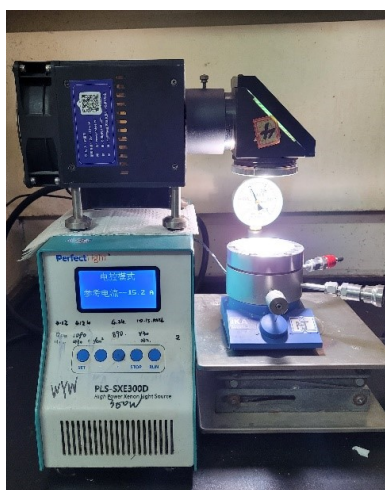

**Figure S7.** The figure of the experimental set up for  $CO_2PR$ .

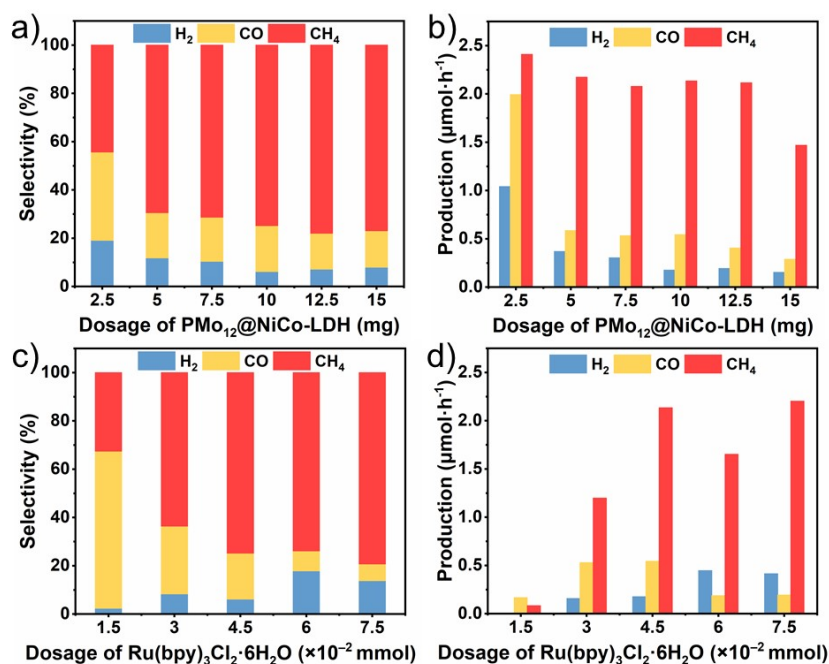

**Figure S8.** a) Selectivity and b) production rate of H<sub>2</sub>, CO and CH<sub>4</sub> in CO<sub>2</sub>PR with various dosage of PMo<sub>12</sub>@NiCo-LDH; c) selectivity and d) production rate of H<sub>2</sub>, CO and CH<sub>4</sub> for PMo<sub>12</sub>@NiCo-LDH in CO<sub>2</sub>PR with various dosage of Ru(bpy)<sub>3</sub>Cl<sub>2</sub>·6H<sub>2</sub>O.

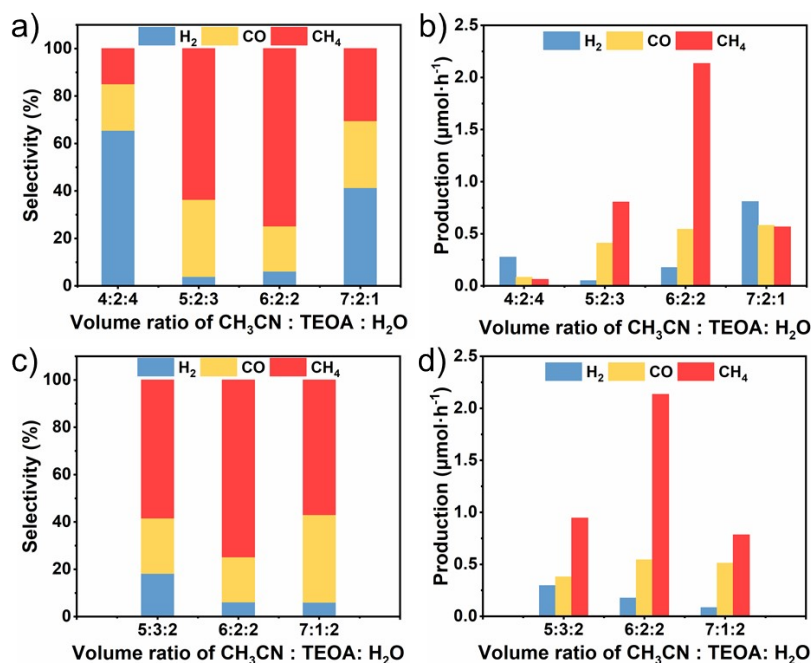

**Figure S9.** a), c) Selectivity and b), d) production rate of H<sub>2</sub>, CO and CH<sub>4</sub> for PMo<sub>12</sub>@NiCo-LDH in CO<sub>2</sub>PR with various volume ratio of CH<sub>3</sub>CN : TEOA : H<sub>2</sub>O.



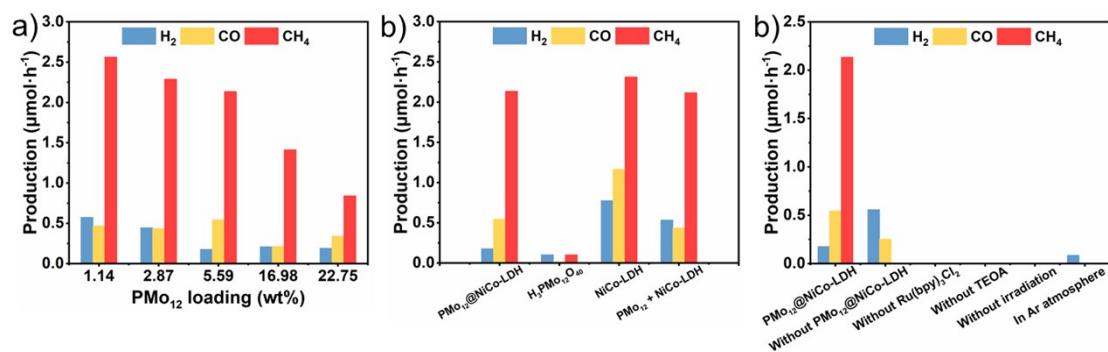

**Figure S10.** The influence of **a)**  $\text{PMo}_{12}$  loading, **b)** catalysts, **c)** reaction conditions on the production rate of  $\text{H}_2$ ,  $\text{CO}$  and  $\text{CH}_4$  in  $\text{CO}_2\text{PR}$ .

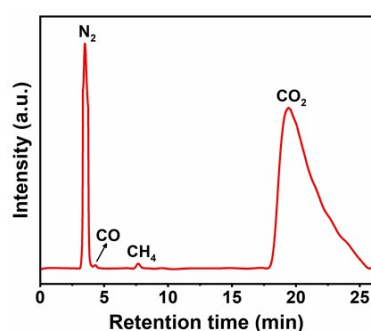

**Figure S11.** GC spectrum (connected to MS) of the reaction products for  $\text{PMo}_{12}@NiCo-LDH$  in  $\text{CO}_2\text{PR}$ .

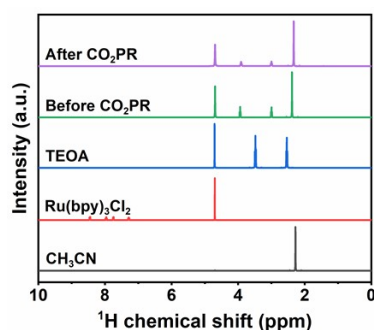

**Figure S12.**  $^1\text{H}$  NMR spectra of  $\text{CH}_3\text{CN}$ ,  $\text{TEOA}$ ,  $\text{Ru}(\text{bpy})_3\text{Cl}_2 \cdot 6\text{H}_2\text{O}$  and the liquid mixture of reaction system before and after  $\text{CO}_2\text{PR}$ .

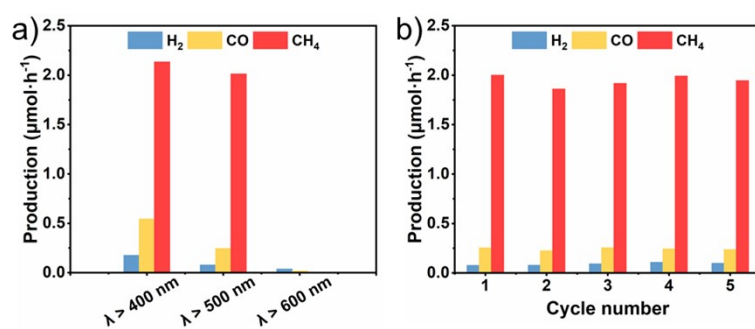

**Figure S13.** Production rate of  $\text{H}_2$ ,  $\text{CO}$  and  $\text{CH}_4$  in  $\text{CO}_2\text{PR}$  **a)** under irradiation of various wavelength and **b)** in various cycle numbers under  $\lambda > 500 \text{ nm}$ .

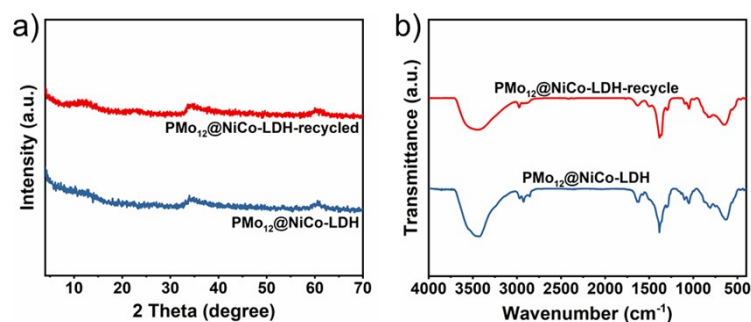

**Figure S14.** a) XRD patterns and b) FT-IR spectra of as-prepared PMo<sub>12</sub>@NiCo-LDH and recycled PMo<sub>12</sub>@NiCo-LDH after CO<sub>2</sub>PR.

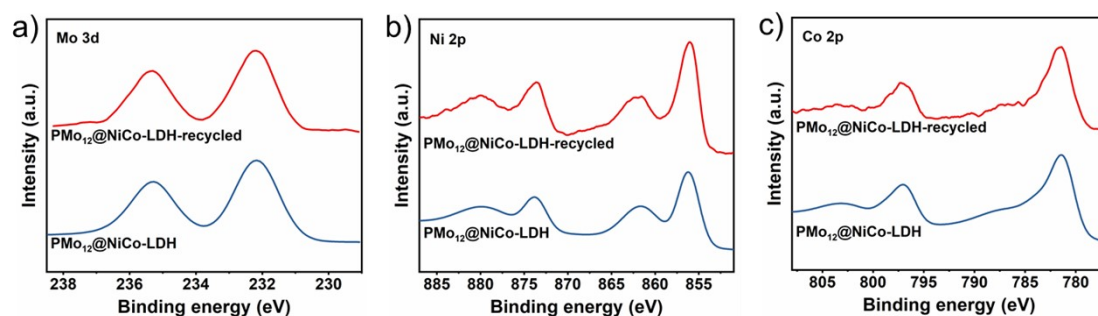

**Figure S15.** XPS spectra of a) Mo 3d b) Ni 2p and c) Co 2p for as-prepared PMo<sub>12</sub>@NiCo-LDH and recycled PMo<sub>12</sub>@NiCo-LDH after CO<sub>2</sub>PR.

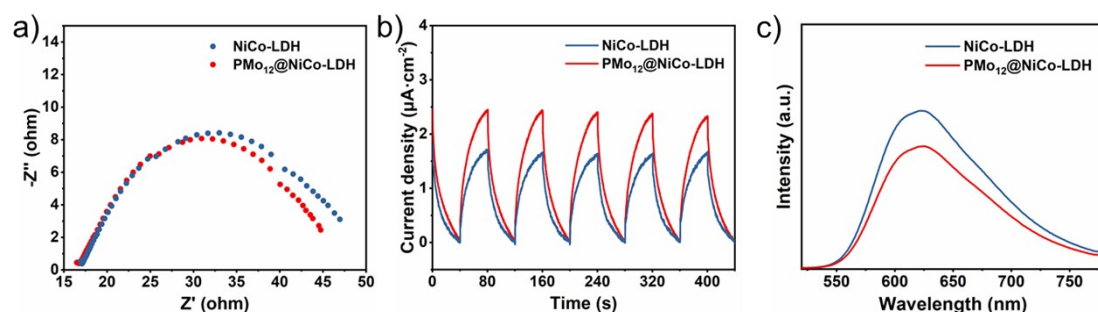

**Figure S16.** a) Electrochemical impedance spectra (EIS), b) photocurrent–time profiles, c) room-temperature photoluminescence (PL) spectra of NiCo-LDH and PMo<sub>12</sub>@NiCo-LDH.

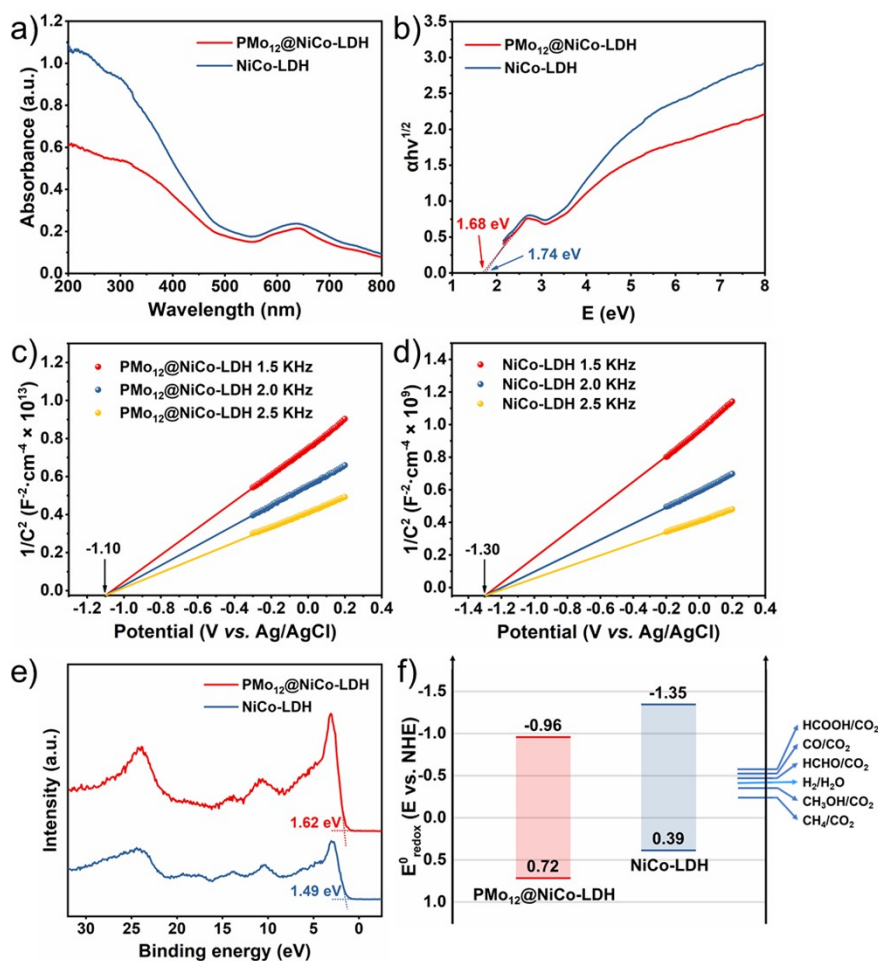

**Figure S17.** a) UV-vis spectra and b) bandgaps calculated from Tauc plots of PMo<sub>12</sub>@NiCo-LDH and NiCo-LDH; Mott-Schottky plots of c) PMo<sub>12</sub>@NiCo-LDH and d) NiCo-LDH. e) valence band XPS spectra of PMo<sub>12</sub>@NiCo-LDH and NiCo-LDH; f) conduction band minimum (CBM), valence band maximum (VBM) of PMo<sub>12</sub>@NiCo-LDH and NiCo-LDH.

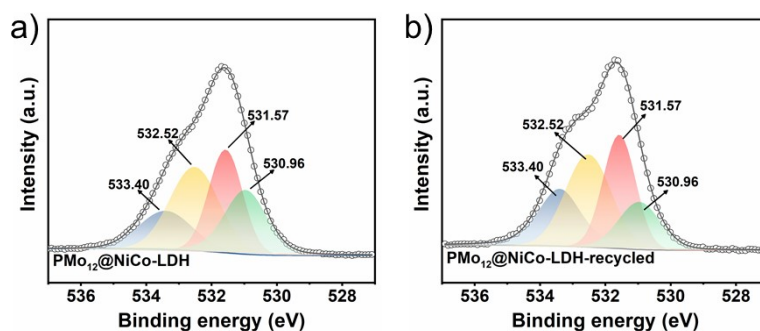

**Figure S18.** XPS spectra of O 1s for a) PMo<sub>12</sub>@NiCo-LDH and b) recycled PMo<sub>12</sub>@NiCo-LDH after the CO<sub>2</sub>PR.

**Table S1.** Porosity properties of PMo<sub>12</sub>@ZIF-67 and PMo<sub>12</sub>@NiCo-LDH.

| Catalyst                    | $S_{\text{BET}}$<br>( $\text{m}^2 \cdot \text{g}^{-1}$ ) | $V_{\text{meso}}$<br>( $\text{cm}^3 \cdot \text{g}^{-1}$ ) | $V_{\text{micro}}$<br>( $\text{cm}^3 \cdot \text{g}^{-1}$ ) | $D_p$<br>(nm) |
|-----------------------------|----------------------------------------------------------|------------------------------------------------------------|-------------------------------------------------------------|---------------|
| PMo <sub>12</sub> @ZIF-67   | 1187                                                     | 0.15                                                       | 0.55                                                        | 1.0, 1.5      |
| PMo <sub>12</sub> @NiCo-LDH | 190                                                      | 0.54                                                       | –                                                           | 6             |

**Table S2.** Comparison of CO<sub>2</sub>PR performance for various photocatalytic system in this work and in previous literature.

| Catalyst                      | Photosensitizer co-catalyst                               | Sacrificial agent | Solvent          | Light source                      | Major product selectivity                                    | Production rate<br>( $\mu\text{mol} \cdot \text{g}^{-1} \cdot \text{h}^{-1}$ ) | Reference |
|-------------------------------|-----------------------------------------------------------|-------------------|------------------|-----------------------------------|--------------------------------------------------------------|--------------------------------------------------------------------------------|-----------|
| NENU-606                      | [Ru(bpy) <sub>3</sub> ]Cl <sub>2</sub> ·6H <sub>2</sub> O | TEOA              | H <sub>2</sub> O | 300 W Xe<br>( $\lambda > 420$ nm) | CH <sub>4</sub> : 85.5%<br>CO: 14.5%                         | 1.7478<br>0.2957                                                               | [2]       |
| 3D Fe–Mn POM structures       | [Ru(bpy) <sub>3</sub> ]Cl <sub>2</sub> ·6H <sub>2</sub> O | TEOA              | H <sub>2</sub> O | 280 W Xe<br>( $\lambda = 415$ nm) | CH <sub>4</sub> : 92.6%<br>CO: 7.4%                          | 1.440<br>0.115                                                                 | [3]       |
| TiO <sub>2</sub> /NiAl-LDH    | –                                                         | –                 | H <sub>2</sub> O | 300 W Xe<br>Simulated-solar-light | CH <sub>4</sub> : 81.8%<br>CO: 9.9%<br>H <sub>2</sub> : 8.3% | 20.56<br>2.48<br>2.08                                                          | [4]       |
| Cu <sub>2-x</sub> S/Ni-Al-LDH | –                                                         | –                 | H <sub>2</sub> O | 300 W Xe<br>Simulated-solar-light | CH <sub>4</sub> : 72.8%<br>CO: 27.2 %                        | 14.2<br>5.3                                                                    | [5]       |

|                                                        |                                                           |      |                                      |                          |                                                                  |                                                                                     |                  |
|--------------------------------------------------------|-----------------------------------------------------------|------|--------------------------------------|--------------------------|------------------------------------------------------------------|-------------------------------------------------------------------------------------|------------------|
| ZnCr-LDH/Ti <sub>3</sub> C <sub>2</sub> T <sub>x</sub> | –                                                         | –    | H <sub>2</sub> O                     | 300 W Xe<br>(λ = 385 nm) | CH <sub>4</sub> : 14%<br>CO: 86%                                 | 19.95 μmol g <sup>-1</sup><br>122.45 μmol g <sup>-1</sup>                           | [6]              |
| Monolayer NiAl-LDH                                     | [Ru(bpy) <sub>3</sub> ]Cl <sub>2</sub> ·6H <sub>2</sub> O | TEOA | MeCN-H <sub>2</sub> O<br>(3 : 1 v/v) | 300 W Xe<br>(λ > 600 nm) | CH <sub>4</sub> : 70.3%<br>CO: 29.7%                             | 103<br>43                                                                           | [7]              |
| HC-NiCo-LDH                                            | [Ru(bpy) <sub>3</sub> ]Cl <sub>2</sub> ·6H <sub>2</sub> O | TEOA | MeCN-H <sub>2</sub> O<br>(2 : 1 v/v) | 300 W Xe<br>(λ > 400 nm) | CH <sub>4</sub> : 62.7%<br>CO: 35.6 %<br>H <sub>2</sub> : 1.7%   | 560<br>311<br>29                                                                    | [8]              |
| Monolayer NiFe-LDH                                     | [Ru(bpy) <sub>3</sub> ]Cl <sub>2</sub> ·6H <sub>2</sub> O | TEOA | MeCN-H <sub>2</sub> O<br>(3 : 1 v/v) | 300 W Xe<br>(λ > 400 nm) | CH <sub>4</sub> : 81.75%<br>CO: 15.68%<br>H <sub>2</sub> : 2.57% | 1.52 μmol·h <sup>-1</sup><br>0.29 μmol·h <sup>-1</sup><br>0.05 μmol·h <sup>-1</sup> | [9]              |
| PMo <sub>12</sub> @NiCo-LDH                            | [Ru(bpy) <sub>3</sub> ]Cl <sub>2</sub> ·6H <sub>2</sub> O | TEOA | MeCN-H <sub>2</sub> O<br>(3 : 1 v/v) | 300 W Xe<br>(λ > 400 nm) | CH <sub>4</sub> : 74.8%<br>CO: 19.0%<br>H <sub>2</sub> : 6.2%    | 2.13 μmol·h <sup>-1</sup><br>0.54 μmol·h <sup>-1</sup><br>0.18 μmol·h <sup>-1</sup> | <b>This work</b> |
| PMo <sub>12</sub> @NiCo-LDH                            | [Ru(bpy) <sub>3</sub> ]Cl <sub>2</sub> ·6H <sub>2</sub> O | TEOA | MeCN-H <sub>2</sub> O<br>(3 : 1 v/v) | 300 W Xe<br>(λ > 500 nm) | CH <sub>4</sub> : 86.2%<br>CO: 10.5%<br>H <sub>2</sub> : 3.3%    | 2.01 μmol·h <sup>-1</sup><br>0.24 μmol·h <sup>-1</sup><br>0.08 μmol·h <sup>-1</sup> | <b>This work</b> |

## Reference

- [1] L. Zhang, T. Mi, M. A. Ziaee, L. Liang and R. Wang, Hollow POM@MOF hybrid-derived porous  $\text{Co}_3\text{O}_4/\text{CoMoO}_4$  nanocages for enhanced electrocatalytic water oxidation, *J. Mater. Chem. A*, 2018, **6**, 1639-1647.
- [2] S.-L. Xie, J. Liu, L.-Z. Dong, S.-L. Li, Y.-Q. Lan and Z.-M. Su, Hetero-metallic active sites coupled with strongly reductive polyoxometalate for selective photocatalytic  $\text{CO}_2$ -to- $\text{CH}_4$  conversion in water, *Chem. Sci.*, 2019, **10**, 185-190.
- [3] Y. Benseghir, A. Solé-Daura, P. Mialane, J. m. Marrot, L. Dalecky, S. Béchu, M. Frégnaux, M. Gomez-Mingot, M. Fontecave, C. Mellot-Draznieks and A. Dolbecq, Understanding the photocatalytic reduction of  $\text{CO}_2$  with heterometallic molybdenum(V) phosphate polyoxometalates in aqueous media, *ACS Catal.*, 2022, **23**, 453-464.
- [4] W.-K. Jo, S. Moru and S. Tonda, A green approach to the fabrication of a  $\text{TiO}_2/\text{NiAl-LDH}$  core-shell hybrid photocatalyst for efficient and selective solar-powered reduction of  $\text{CO}_2$  into value-added fuels, *J. Mater. Chem. A*, 2020, **8**, 8020-8032.
- [5] X.-Y. Ji, R.-T. Guo, J.-Y. Tang, Y.-F. Miao, Z.-D. Lin, L.-F. Hong, Y. Yuan, Z.-S. Li and W.-G. Pan, Construction of full solar-spectrum-driven  $\text{Cu}_{2-x}\text{S}/\text{Ni-Al-LDH}$  heterostructures for efficient photocatalytic  $\text{CO}_2$  reduction, *ACS Appl. Energy Mater.*, 2022, **5**, 2862-2872.
- [6] B. Zhou, Y. Yang, Z. Liu, N. Wu, Y. Yan, Z. Wenhua, H. He, J. Du, Y. Zhang, Y. Zhou and Z. Zou, Boosting photocatalytic  $\text{CO}_2$  reduction via Schottky junction with ZnCr layered double hydroxide nanoflakes aggregated on 2D  $\text{Ti}_3\text{C}_2\text{T}_x$  cocatalyst, *Nanoscale*, 2022, **14**, 7538-7546.
- [7] L. Tan, S.-M. Xu, Z. Wang, Y. Xu, X. Wang, X. Hao, S. Bai, C. Ning, Y. Wang, W. Zhang, Y. K. Jo, S.-J. Hwang, X. Cao, X. Zheng, H. Yan, Y. Zhao, H. Duan and Y.-F. Song, Highly selective photoreduction of  $\text{CO}_2$  with suppressing  $\text{H}_2$  evolution over monolayer layered double hydroxide under irradiation above 600 nm, *Angew. Chem. Int. Ed.*, 2019, **58**, 11860-11867.
- [8] J. An, T. Shen, W. Chang, Y. Zhao, B. Qi and Y.-F. Song, Defect engineering of NiCo-layered double hydroxide hollow nanocages for highly selective photoreduction of  $\text{CO}_2$  to  $\text{CH}_4$  with suppressing  $\text{H}_2$  evolution, *Inorg. Chem. Front.*, 2021, **8**, 996-1004.
- [9] S. Bai, T. Li, H. Wang, L. Tan, Y. Zhao and Y.-F. Song, Scale-up synthesis of monolayer layered double hydroxide nanosheets via separate nucleation and aging steps method for efficient  $\text{CO}_2$  photoreduction, *Chem. Eng. J.*, 2021, **419**, 129390.
